# Supplementary material
Source: PubMed Central journal article supplement (PMC1838715)
Supplement: pnas_0604580103_4.pdf [file pnas_0604580103_4.pdf]

R15 KLKEANKQQNFNTGIKDFDFWLSEVEALLASEDYGKDLASVNNLLKKHQL  
R16 KLNE SHRLHQFFRDMDDEESWIKEKKLLVSSSEDYGRDLTGVQNL RKKHKR  
R17 RLEESLEYQQFVANVEEEEAWINEKMTLVASEDYGDTLAAIQGLLKKHEA

R15 LEADISAHEDRLKDLNSQADSLMTSSAFDTSQVKDKRETINGRFQRIKSM  
R16 LEAELAAHEPAIQGVLDTGKKLSDDNTIGKEEIQQRLAQFVDHWKELKQL  
R17 FETDFTVHKDRVNDVCANGEDLIKKNHHVENITAKMKGLKGKVS DLEKA

R15 AAARRAKLNE SHRL  
R16 AAARGQRLEESLEYQQ  
R17 AAQRKAKLDENSAFLQ
