# Supplementary material
Source: PubMed Central journal article supplement (PMC1838715)

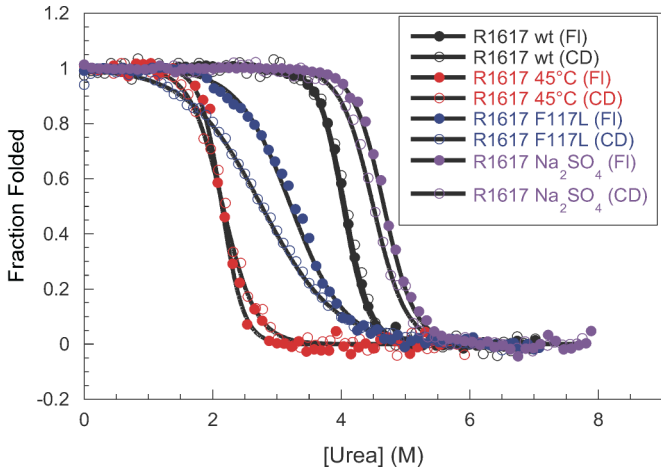

Supplement: pnas_0604580103_1.pdf [file pnas_0604580103_1.pdf]

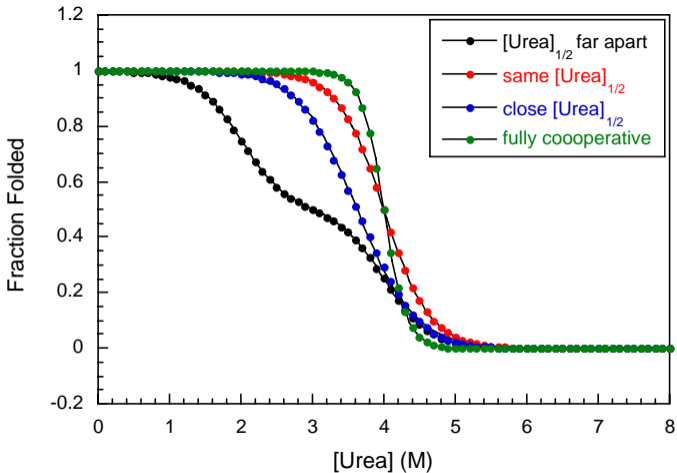

Supplement: pnas_0604580103_3.pdf [file pnas_0604580103_3.pdf]
